# Supplementary material for: Amazon rainforest photosynthesis increases in response to atmospheric dryness
Source: PubMed Central journal article supplement — Sci Adv. 2020 Nov 20;6(47):eabb7232. doi: 10.1126/sciadv.abb7232 (PMC7679161; doi:10.1126/sciadv.abb7232), 2020-11-20
Supplement: abb7232_SM.pdf [file abb7232_SM.pdf]

## Supplementary Materials for

### **Amazon rainforest photosynthesis increases in response to atmospheric dryness**

J. K. Green\*, J. Berry, P. Ciais, Y. Zhang, P. Gentine

\*Corresponding author. Email: [julia.green@lsce.ipsl.fr](mailto:julia.green@lsce.ipsl.fr)

Published 20 November 2020, *Sci. Adv.* **6**, eabb7232 (2020)  
DOI: 10.1126/sciadv.abb7232

#### **This PDF file includes:**

Tables S1 and S2  
Figs. S1 to S9

**Table S1. CMIP5 Model Information.**

| <b>Modeling Center (or group)</b>                                                                                                                         | <b>Institute ID</b> | <b>Model Name</b> |
|-----------------------------------------------------------------------------------------------------------------------------------------------------------|---------------------|-------------------|
| Beijing Climate Center, China Meteorological Administration                                                                                               | BCC                 | BCC-CSM1-1        |
| Canadian Centre for Climate Modelling and Analysis                                                                                                        | CCCMA               | CanESM2           |
| National Center for Atmospheric Research/ University Corporation for Atmospheric Research                                                                 | NCAR/UCAR           | CCSM4             |
| National Center for Atmospheric Research/ University Corporation for Atmospheric Research                                                                 | NCAR/UCAR           | CESM1-BGC         |
| NOAA Geophysical Fluid Dynamics Laboratory                                                                                                                | NOAA GFDL           | GFDL-ESM2M        |
| Institute of Numerical Mathematics, Russian Academy of Sciences                                                                                           | INM RAS             | INM-CM4           |
| Institut Pierre-Simon Laplace                                                                                                                             | IPSL                | IPSL-CM5A-LR      |
| Japan Agency for Marine-Earth Science and Technology (JAMSTEC), Centre for Climate System Research / National Institute for Environmental Studies, Japan. | MIROC               | MIROC-ESM         |
| Meteorological Research Institute (MRI) of Japan                                                                                                          | MRI                 | MRI-ESM1          |
| Norwegian Climate Center                                                                                                                                  | NCC                 | NorESM1-M         |

**Table S2. Flux tower information**

| <b>Site ID</b>                        | <b>Site Description</b>                              | <b>Data availability</b>      |
|---------------------------------------|------------------------------------------------------|-------------------------------|
| Manaus-ZF2 K34/<br>BR-Ma2             | Wet, tropical rainforest                             | January 2002-December<br>2004 |
| Santarem-Km67-Primary<br>Forest/BR-Sa | Wet, tropical rainforest                             | January 2002-December<br>2004 |
| Tocantins – Ilha do<br>Bananal/BR-BAN | Seasonally flooded forest,<br>savannah and grassland | January 2004-December<br>2006 |

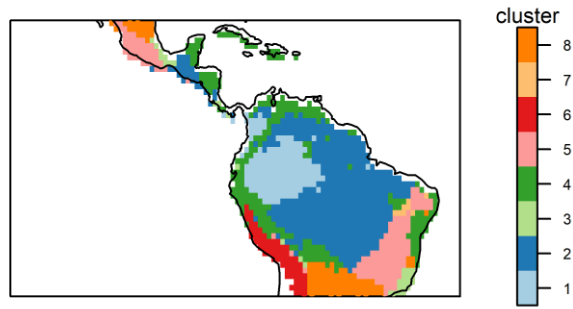

**Fig. S1. K-means clustering results.** The clusters generated via a k-means clustering analysis using precipitation, radiation, temperature, VPD, and SIF data as inputs. Monthly data is used from the time period of 2007-2016. Clusters are ranked from wettest (cluster 1) to driest (cluster 8).

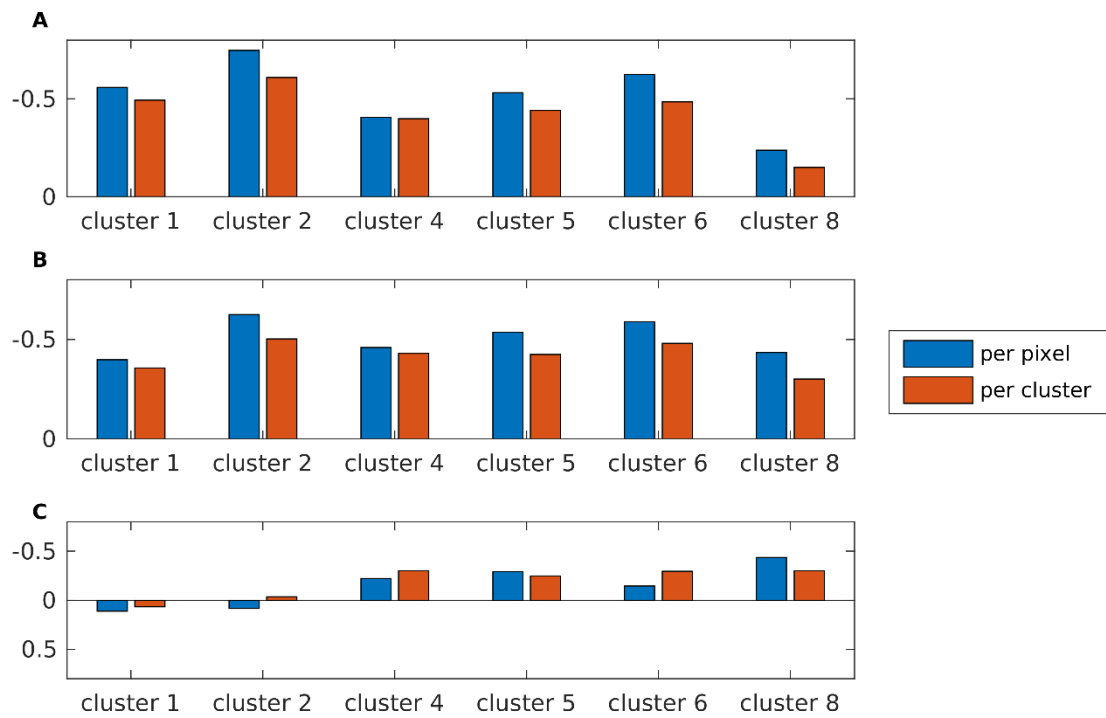

**Fig. S2. VPD and precipitation correlations.** Correlations between VPD and precipitation at a 0-month lag (**A**), a 2-month lag (**B**), and a 4-month lag (**C**). The median correlation between VPD and precipitation for each pixel within a cluster is depicted in blue, while the correlation of VPD and precipitation using all pixels per cluster is displayed in orange.

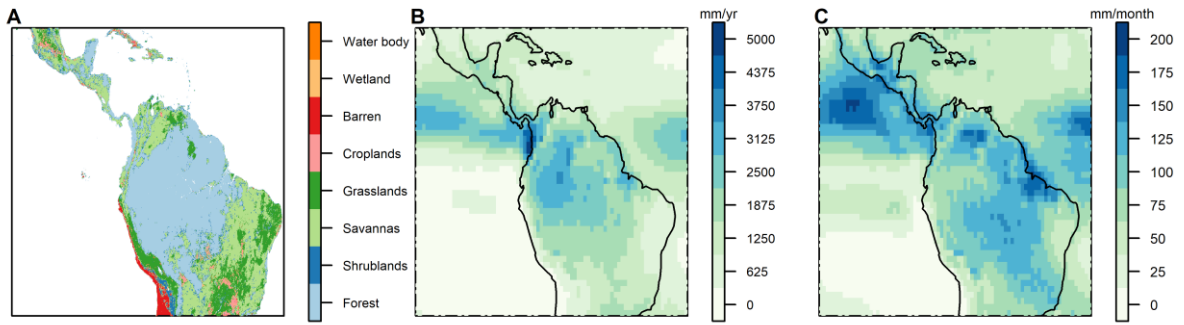

**Fig. S3. Land cover types and precipitation.** Land cover types from MODIS land cover data (A), average precipitation per year (B), and the standard deviation of the monthly GPCP precipitation data (2007-2016) (C) in the tropical region of the Americas.

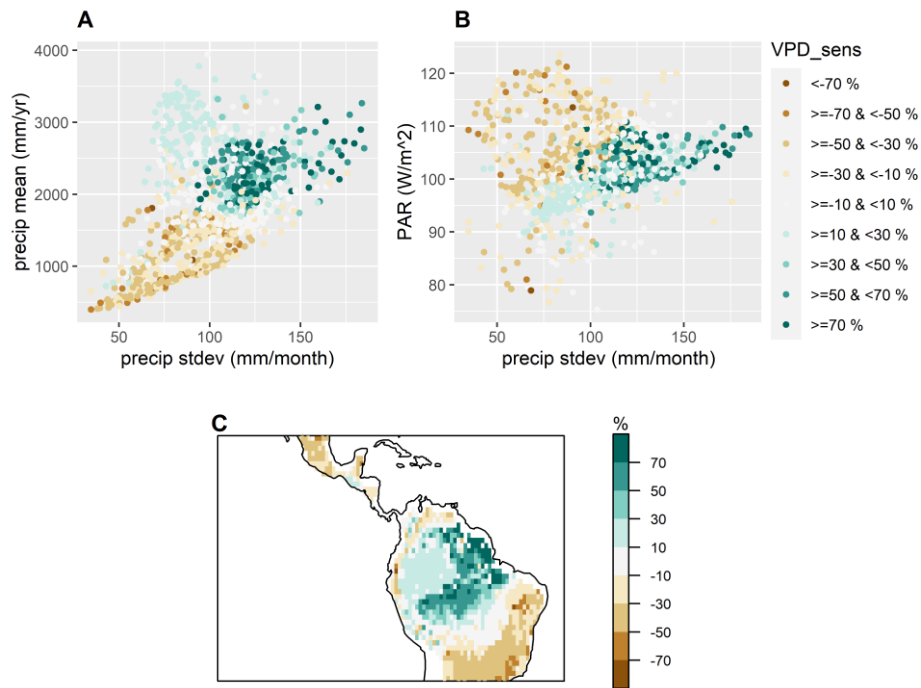

**Fig. S4. VPD sensitivity scatter plots: full year.** Mean annual precipitation vs. the standard deviation of precipitation (**A**), and mean PAR vs. the standard deviation of precipitation (**B**) for each pixel location within the study area. The color of each point corresponds to that location's SIF sensitivity to VPD for the full year (dry and wet season together) (**C**), as determined by the artificial neural network analysis.

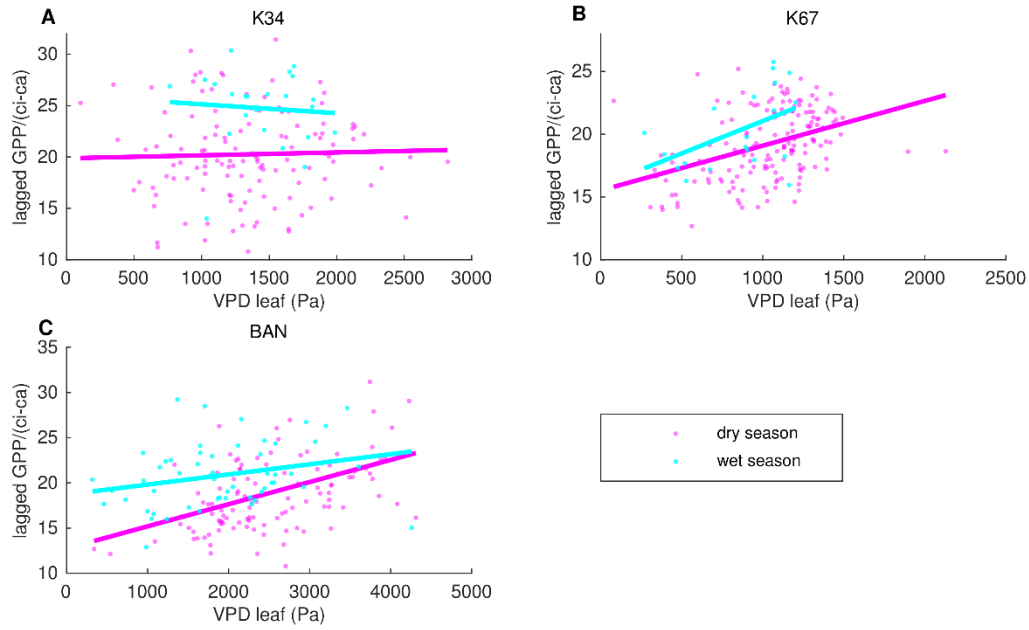

**Fig. S5. Lagged biogeochemistry flux tower results vs. VPD.** Flux tower data from three sites (K34 (A), K67 (B) and BAN (C)) in Amazonia showing the mean climatology of GPP normalized by the ratio of leaf internal CO<sub>2</sub> partial pressure ( $c_i$ ) to atmospheric CO<sub>2</sub> partial pressure ( $c_a$ ) lagged by two months versus VPD at the leaf surface. Daytime data with no precipitation is used for varying time periods between 2002 and 2006 based on data availability.



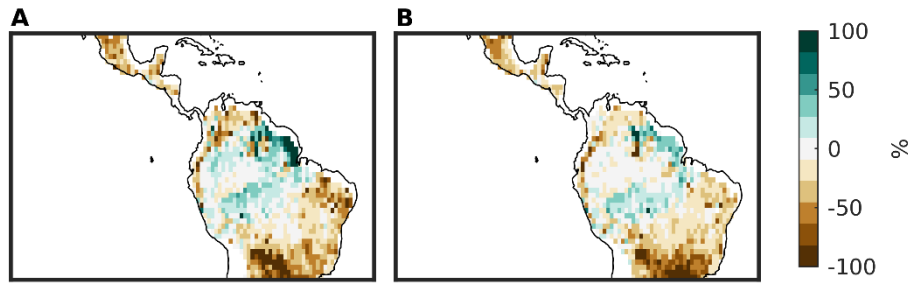

**Fig. S6. ANN sensitivity analysis results for an extreme event.** Remote sensing results for the dry season sensitivity of SIF to VPD for a non-anomalous year, 2014 (**A**), and of dry season sensitivity of SIF to VPD for the 2015 El Niño (**B**).

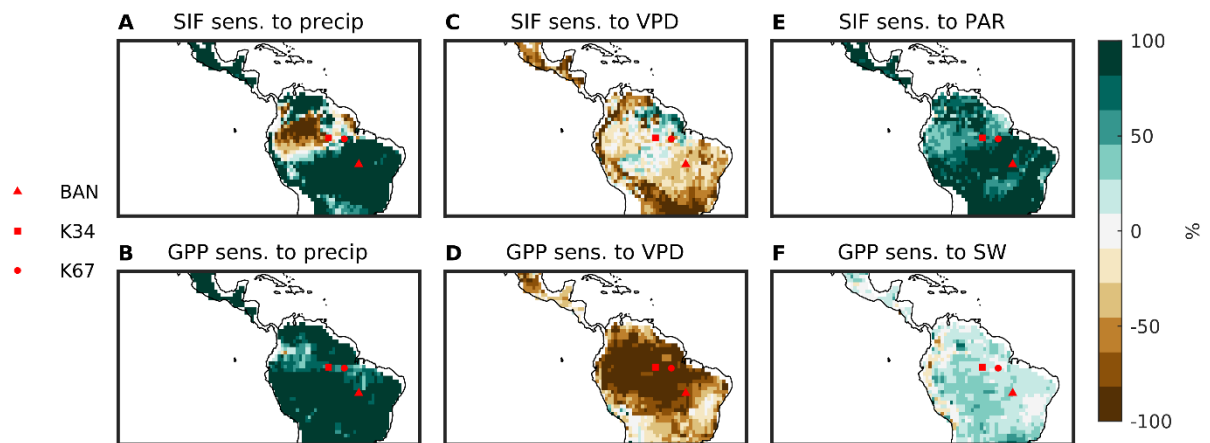

**Fig. S7. ANN sensitivity analysis results using 2 standard deviations: dry season.** Remote sensing results for the sensitivity of SIF to precipitation (**A**), VPD (**C**), and PAR (**E**). Stippling represents areas of a median r-value  $> 0.6$ . Model results for the sensitivity of GPP to precipitation (**B**), VPD (**D**), and SW (**F**). Stippling represents regions where at least 6 of the 10 models agree on the sign of the feedback depicted.

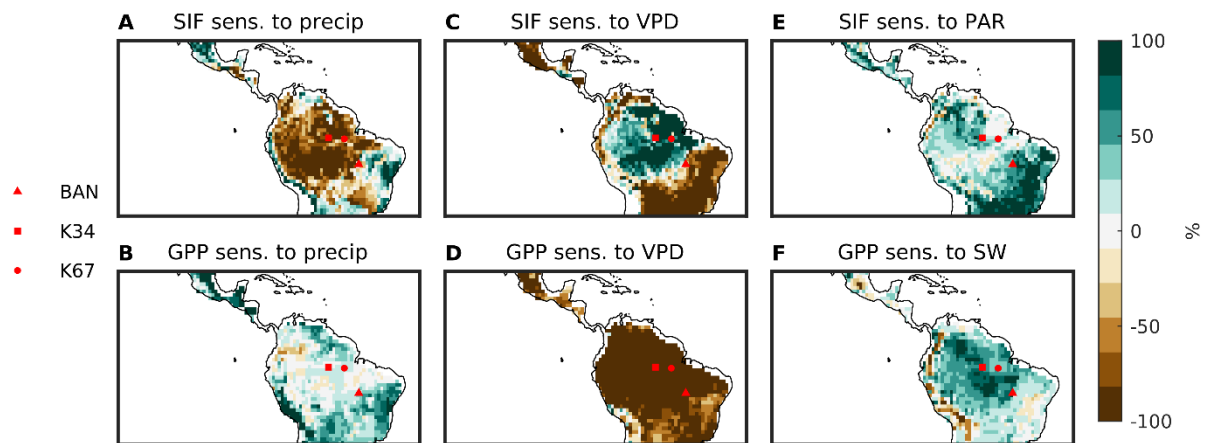

**Fig. S8. ANN sensitivity analysis results using 2 standard deviations: wet season.** Remote sensing results for the sensitivity of SIF to precipitation (**A**), VPD (**C**), and PAR (**E**). Stippling represents areas of a median r-value  $> 0.6$ . Model results for the sensitivity of GPP to precipitation (**B**), VPD (**D**), and SW (**F**). Stippling represents regions where at least 6 of the 10 models agree on the sign of the feedback depicted.

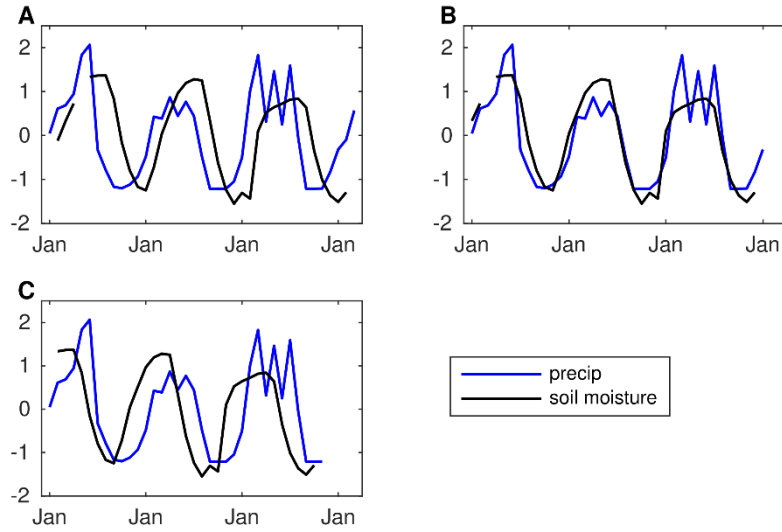

**Fig. S9. Soil moisture and precipitation time series.** The time series of monthly soil moisture and precipitation flux tower data normalized by their means and standard deviations for BAN at a 0-month lag (**A**), soil moisture with a 2-month lag (**B**), and soil moisture with a 4-month lag (**C**). BAN is the only tower used for this analysis as it is the only tower with publicly available soil moisture data.
